# Supplementary material for: Atypical Neurogenesis, Astrogliosis, and Excessive Hilar Interneuron Loss Are Associated with the Development of Post-Traumatic Epilepsy
Source: MDPI journal article supplement (doi:10.3390/cells12091248), 2023-04-25
Supplement: s1 [file s1]

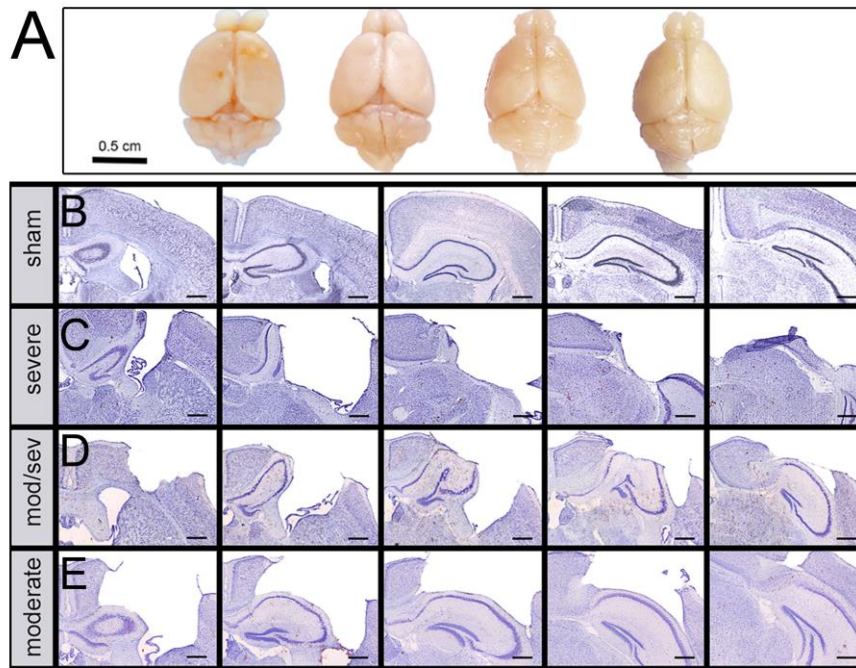

**Figure S1.** Histological evaluation of injury severity after CCI: (A) Gross image of sham brains before sectioning; (B–E) coronal sections from anterior to posterior (A/P -1 to A/P +2.85), displaying the loss of cortical and hippocampal tissue in severe injury (C), partial loss of hippocampal tissue in moderate/severe injury (D), or unaffected hippocampus in moderate injury (E). The intact cortex and hippocampus can be seen in the sham images (B).

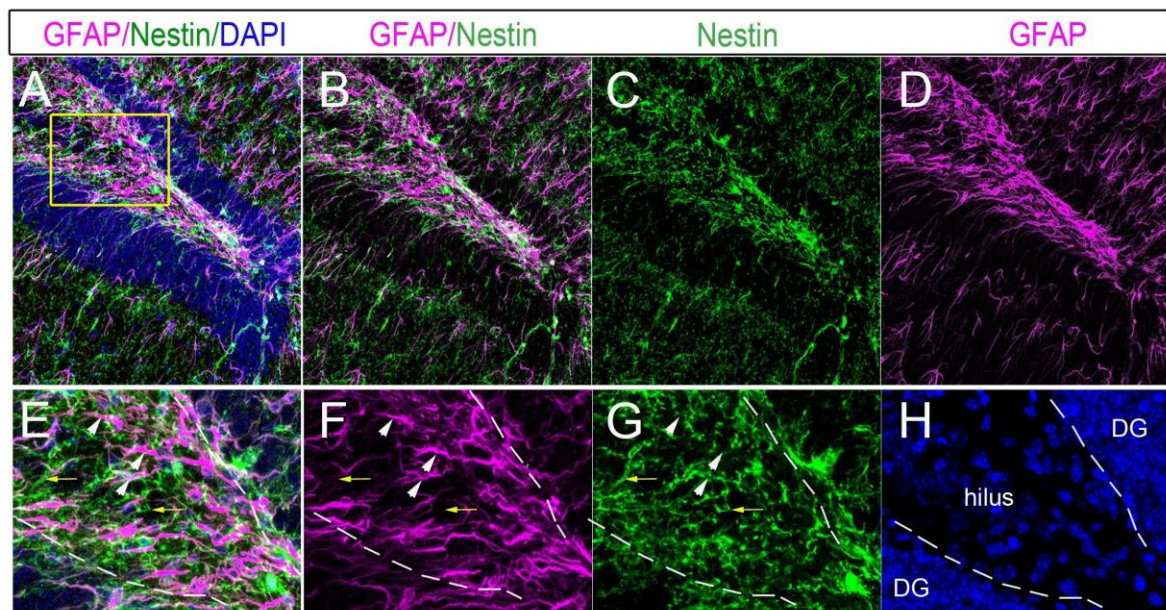

**Figure S2.** Immunofluorescence of GFAP and nestin staining in the DG: (A–D) Max z-projection of 10x confocal images showing GFAP (purple) and nestin (green) staining in the DG at four months post-injury. Merged images

(**A,B**) show GFAP and nestin staining co-localized (white) in the SGZ of the DG, but not the hilus. (**E-H**) Higher magnification from inset A showing lack of co-localization of hilar astrocytes with the neural stem/progenitor marker nestin. Increased astrocyte coverage in the post-injury hilus is not the result of aberrant migration of the neural stem cell pool, which expresses both GFAP and nestin. DG = dentate gyrus.
