# Supplementary material for: Atypical Neurogenesis, Astrogliosis, and Excessive Hilar Interneuron Loss Are Associated with the Development of Post-Traumatic Epilepsy
Source: MDPI journal article supplement (doi:10.3390/cells12091248), 2023-04-25
Supplement: s1 [file s1]

**Table S1. Top 20 differentially expressed genes from PTE<sup>+</sup> hippocampal astrocytes vs PTE<sup>-</sup>**

| <b>Ipsilateral Hippocampus</b>   |                         |                |                                                                                                                                    |
|----------------------------------|-------------------------|----------------|------------------------------------------------------------------------------------------------------------------------------------|
| <b>Genes</b>                     | <b>log2 Fold Change</b> | <b>P-value</b> | <b>Function</b>                                                                                                                    |
| <i>Spdl1</i>                     | 24.4                    | 7.7E-15        | Required for the localization of dynein and dynactin to the mitotic kintochore and spindle microtubules.                           |
| <i>Slc16a14</i>                  | 10.3                    | 1.0E-03        | Transport of monocarboxylates across the plasma membrane.                                                                          |
| <i>Elavl3</i>                    | 2.4                     | 5.5E-03        | Binds to AU-rich sequences of target mRNAs, including VEGF mRNA. Involved in neuronal differentiation and maintenance.             |
| <i>B630019K06Rik</i>             | 2.7                     | 1.0E-02        | RIKEN cDNA B630019K06 gene.                                                                                                        |
| <i>Slitrk4</i>                   | 5.3                     | 1.2E-02        | Involved in synaptogenesis, promotes synapse differentiation and suppresses neurite outgrowth.                                     |
| <i>Myef2</i>                     | 1.7                     | 1.3E-02        | Transcriptional repressor of the myelin basic protein gene (MBP).                                                                  |
| <i>Csmd1</i>                     | 2.5                     | 1.9E-02        | Cub and sushi domain-containing protein 1; Belongs to the CSMD family.                                                             |
| <i>Zfp202</i>                    | 3.4                     | 2.3E-02        | Krab and scan domains-containing zinc finger protein; Zinc finger protein 202.                                                     |
| <i>Zfp334</i>                    | 2.4                     | 2.6E-02        | Krab domain-containing zinc finger protein; Zinc finger protein 334.                                                               |
| <i>Jmjd1c</i>                    | 0.8                     | 2.6E-02        | Stone demethylase that specifically demethylates 'Lys-9' of histone H3.                                                            |
| <i>Trim61</i>                    | -25.4                   | 2.1E-15        | Apelin receptor early endogenous ligand; acts as a mitogen by promote cell migration                                               |
| <i>Tlr13</i>                     | -25.6                   | 2.1E-15        | Control host immune response against pathogens through pattern recognition                                                         |
| <i>Lilrb4a</i>                   | -25.3                   | 3.6E-15        | Leukocyte immunoglobulin-like receptor, interferes with TNFRSF5-signaling and NF-kappa-B up- regulation                            |
| <i>Alox5ap</i>                   | -24.5                   | 3.3E-14        | Arachidonate 5-lipoxygenase-activating protein; Required for leukotriene biosynthesis.                                             |
| <i>Slc47a1</i>                   | -24.2                   | 6.8E-14        | Multidrug resistance protein.                                                                                                      |
| <i>Cutal</i>                     | -10.5                   | 6.8E-09        | Periplasmic divalent cation tolerance protein; cutA divalent cation tolerance homolog-like.                                        |
| <i>Lrrc17</i>                    | -4.0                    | 1.8E-05        | Bone homeostasis. Acts as a negative regulator of RANKL-induced osteoclast precursor differentiation from bone marrow precursors.  |
| <i>Ncf4</i>                      | -9.8                    | 1.5E-04        | Neutrophil cytosol factor 4; Component of the NADPH-oxidase, oxidative burst and ROS regeneration.                                 |
| <i>Adamts2</i>                   | -6.5                    | 2.3E-04        | Metallopeptidase, disintegrin and metalloproteinase with thrombospondin motifs 2.                                                  |
| <i>Ush1g</i>                     | -6.9                    | 3.0E-04        | Required for normal development and maintenance of cochlear hair cell bundles.                                                     |
| <b>Contralateral hippocampus</b> |                         |                |                                                                                                                                    |
| <b>Genes</b>                     | <b>log2 Fold Change</b> | <b>P-value</b> | <b>Function</b>                                                                                                                    |
| <i>Sema3f</i>                    | 11.2                    | 1.63E-16       | Required for radial and longitudinal organization of myelinated axons and Conduction of nerve impulses in myelinated nerve fibers. |
| <i>Cd209d</i>                    | 24.2                    | 9.95E-15       | Semaphorin-3F; Sema domain, immunoglobulin domain.                                                                                 |
| <i>Prss35</i>                    | 3.9                     | 1.10E-05       | Protease, serine 35; Belongs to the peptidase S1 family.                                                                           |
| <i>Slco4a1</i>                   | 11.0                    | 4.54E-04       | Mediates the Na(+)-independent transport of organic anions.                                                                        |

|                      |       |          |                                                                                                                                                      |
|----------------------|-------|----------|------------------------------------------------------------------------------------------------------------------------------------------------------|
| <i>Adgrf5</i>        | 2.1   | 6.97E-03 | Adhesion G protein-coupled receptor. Role in lung surfactant homeostasis                                                                             |
| <i>Mrip</i>          | 0.8   | 7.15E-03 | Required for the regulation of the actin cytoskeleton by RhoA and ROCK1, promotes disassembly of stress fibers in neuronal cells.                    |
| <i>Sult5a1</i>       | 3.1   | 7.65E-03 | Sulfotransferase family 5A, member 1; Belongs to the sulfotransferase 1 family.                                                                      |
| <i>Eno2</i>          | 1.6   | 7.83E-03 | Neurotrophic and neuroprotective properties on a broad spectrum of central nervous system (CNS) neurons, promotes cell survival.                     |
| <i>Npy1r</i>         | 3.0   | 7.85E-03 | Neuropeptide Y receptor type 1; Receptor for neuropeptide Y and peptide YY.                                                                          |
| <hr/>                |       |          |                                                                                                                                                      |
| <i>Cd3e</i>          | -25.0 | 5.39E-15 | Receptor on T-lymphocyte, role in adaptive immune response during T cell activation by antigen presenting cells.                                     |
| <i>Ccnf</i>          | -23.1 | 4.38E-13 | Substrate recognition component of a SCF, E3 ubiquitin-protein ligase complex, acting as an inhibitor of centrosome reduplication.                   |
| <i>Exosc6</i>        | -20.6 | 1.09E-10 | MRNA Transport Regulator 3 Homolog. Constitutes one of the subunits of the multisubunit particle called exosome which mediates mRNA degradation.     |
| <i>Cenpa</i>         | -6.3  | 2.19E-08 | Role in assembly of kinetochore proteins, mitotic progression and chromosome segregation.                                                            |
| <i>2810408A11Rik</i> | -10.8 | 5.99E-07 | RIKEN cDNA 2810408A11 gene.                                                                                                                          |
| <i>Lrrc29</i>        | -8.5  | 6.19E-05 | Leucine rich repeat containing 29.                                                                                                                   |
| <i>Egr1</i>          | -2.6  | 1.33E-04 | Transcriptional regulator implicated in growth factors, DNA damage, and ischemia. Cell survival, proliferation and cell death.                       |
| <i>Ccdc69</i>        | -10.0 | 1.76E-04 | Scaffold to regulate the recruitment and assembly of spindle midzone components.                                                                     |
| <i>Kif22</i>         | -4.2  | 7.34E-04 | Involved in spindle formation and the movements of chromosomes during mitosis and meiosis. Binds to microtubules and to DNA.                         |
| <i>Ednra</i>         | -1.6  | 1.02E-03 | Receptor for endothelin-1. Mediates its action by association with G proteins that activate a phosphatidylinositol- calcium second messenger system. |
| <hr/>                |       |          |                                                                                                                                                      |

**Table S2. Key gene that are differentially expressed in hippocampal PTE<sup>+</sup> astrocytes**

| Location                  | Function        | Gene           | Fold change (log2) | p-value |
|---------------------------|-----------------|----------------|--------------------|---------|
| Ipsilateral Hippocampus   | Proliferation   | <i>Nrtn</i>    | -10.13             | 0.00    |
|                           |                 | <i>Eml1</i>    | -1.81              | 0.01    |
|                           |                 | <i>Prkcz</i>   | -1.74              | 0.02    |
|                           | Migration       | <i>Elavl3</i>  | 2.40               | 0.01    |
|                           |                 | <i>Trim61</i>  | -25.36             | 0.00    |
|                           |                 | <i>Mien1</i>   | -1.24              | 0.03    |
|                           |                 | <i>Gm13306</i> | -1.99              | 0.04    |
|                           | Cell morphology | <i>Slitrk4</i> | 5.33               | 0.01    |
|                           |                 | <i>Sept3</i>   | -0.81              | 0.02    |
| Contralateral Hippocampus | Proliferation   | <i>Egr1</i>    | -2.63              | 0.00    |
|                           |                 | <i>Fos</i>     | -2.22              | 0.00    |
|                           |                 | <i>Lsamp</i>   | -0.37              | 0.00    |
|                           |                 | <i>Mdk</i>     | -0.60              | 0.01    |
|                           |                 | <i>Ptn</i>     | -0.36              | 0.02    |
|                           |                 | <i>Eno2</i>    | 1.56               | 0.01    |
|                           | Migration       | <i>Map2</i>    | 0.71               | 0.02    |
|                           |                 | <i>Unc5a</i>   | 3.00               | 0.04    |
|                           | Cell morphology | <i>Sema3f</i>  | 11.17              | 0.00    |
|                           |                 | <i>Mrip</i>    | 0.77               | 0.01    |
|                           |                 | <i>Map2</i>    | 0.71               | 0.02    |
|                           |                 | <i>Map1b</i>   | 1.17               | 0.05    |
